# Supplementary material for: Thermally Induced Silane Dehydrocoupling: Hydrophobic and Oleophilic Filter Paper Preparation for Water Separation and Removal from Organic Solvents
Source: MDPI journal article supplement (doi:10.3390/ma14195775), 2021-10-02
Supplement: s1 [file s1]

Article

# Thermally Induced Silane Dehydrocoupling: Hydrophobic and Oleophilic Filter Paper Preparation for Water Separation and Removal from Organic Solvents

Rae Hyung Kang <sup>1,2</sup> and Dokyoung Kim <sup>1,2,3,4,5,\*</sup>

<sup>1</sup> Department of Biomedical Science, Graduate School, Kyung Hee University, Seoul 02447, Korea; hphopo2000@hanmail.net

<sup>2</sup> Medical Research Center for Bioreaction to Reactive Oxygen Species and Biomedical Science Institute, School of Medicine, Kyung Hee University, Seoul 02447, Korea

<sup>3</sup> Center for Converging Humanities, Kyung Hee University, Seoul 02447, Korea

<sup>4</sup> Department of Anatomy and Neurobiology, College of Medicine, Kyung Hee University, Seoul 02447, Korea

<sup>5</sup> KHU-KIST Department of Converging Science and Technology, Kyung Hee University, Seoul 02447, Korea

\* Correspondence: dskim@khu.ac.kr

## This file includes:

1. Supporting Figures: Figure S1 to S8
2. Supporting Tables: Table S1 to S2

## 1. Supporting Figures

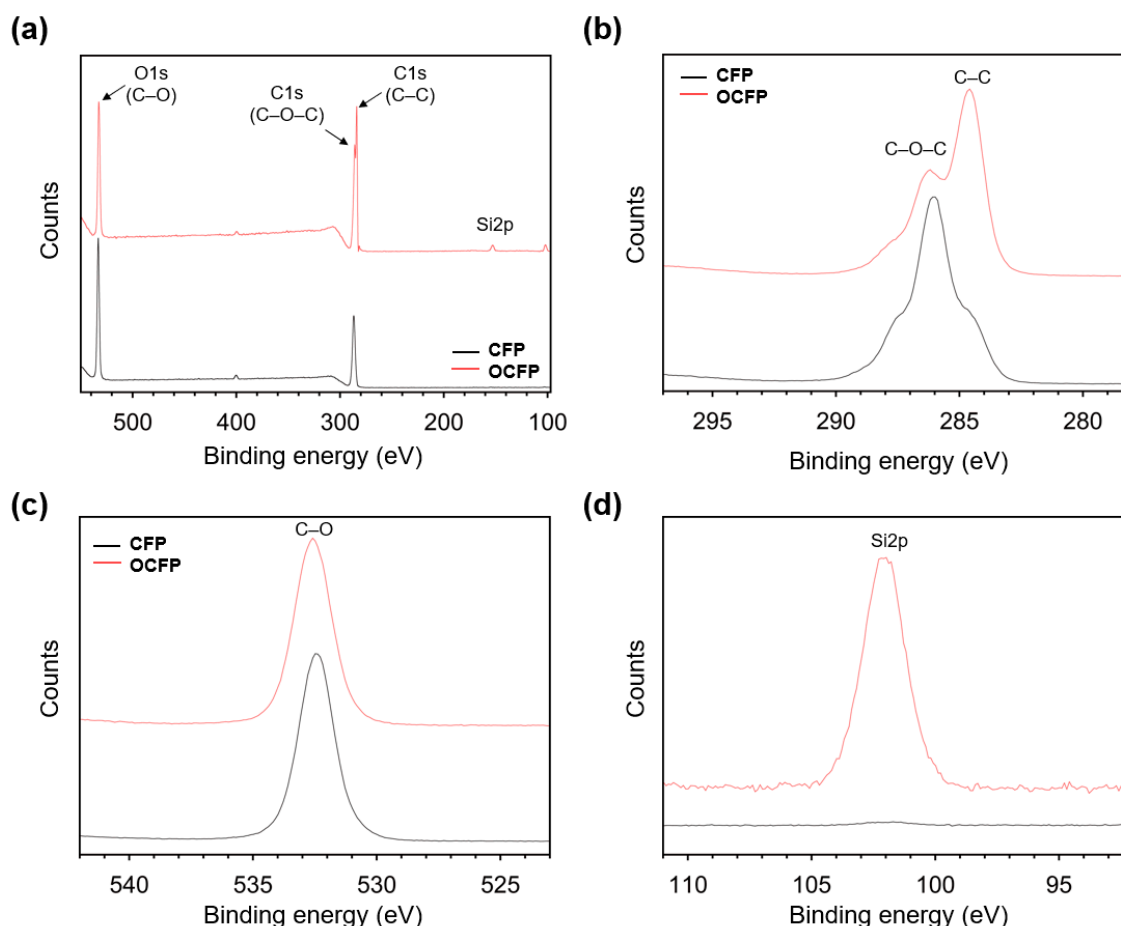

**Figure S1.** X-ray photoelectron spectroscopy (XPS) spectra of CFP and OCFP with the carbon, oxygen, and silicon signal. (a) Survey spectra, (b) High-resolution C1s spectra, (c) High-resolution O1s spectra, and (d) High-resolution Si2p spectra.

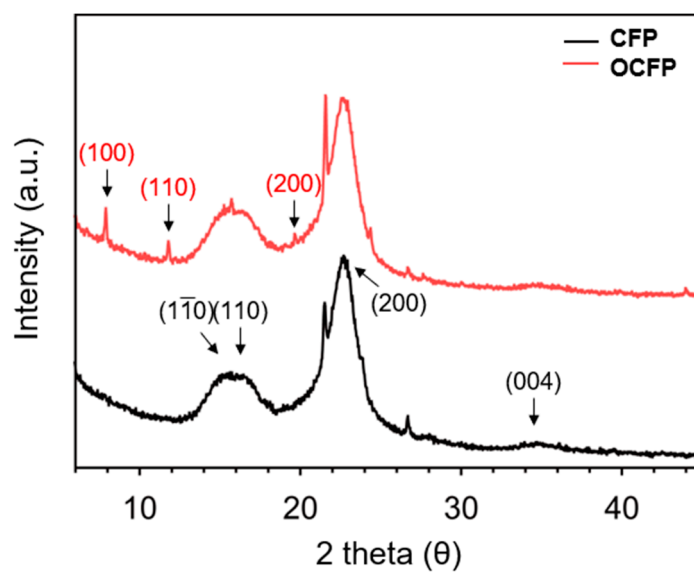

**Figure S2.** XRD analysis of CFP and OCFP.

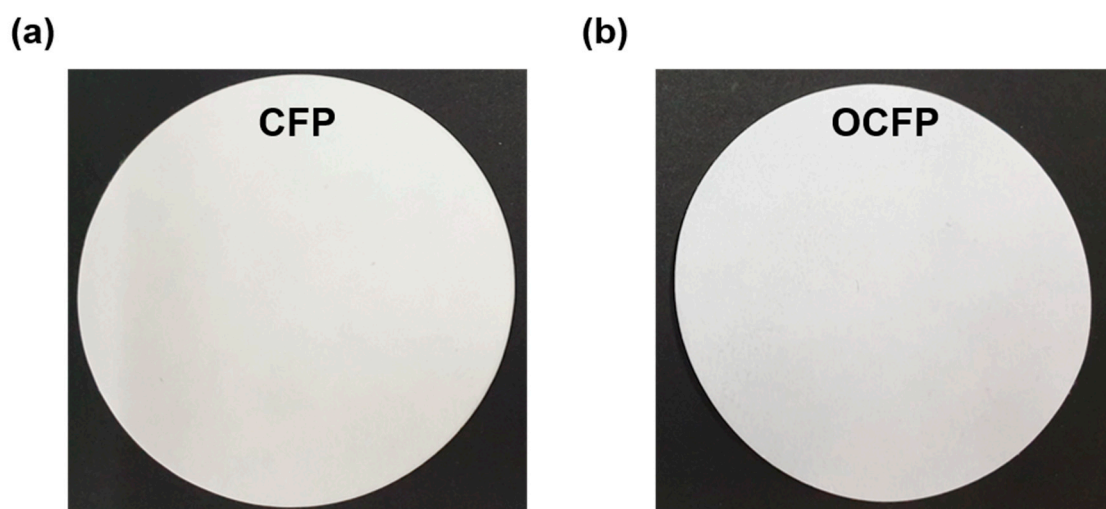

**Figure S3.** Representative photographs of (a) Cellulose-based filter paper (CFP) and (b) ODS-coated cellulose-based filter paper (OCFP). The diameter of filter papers is 70 mm.

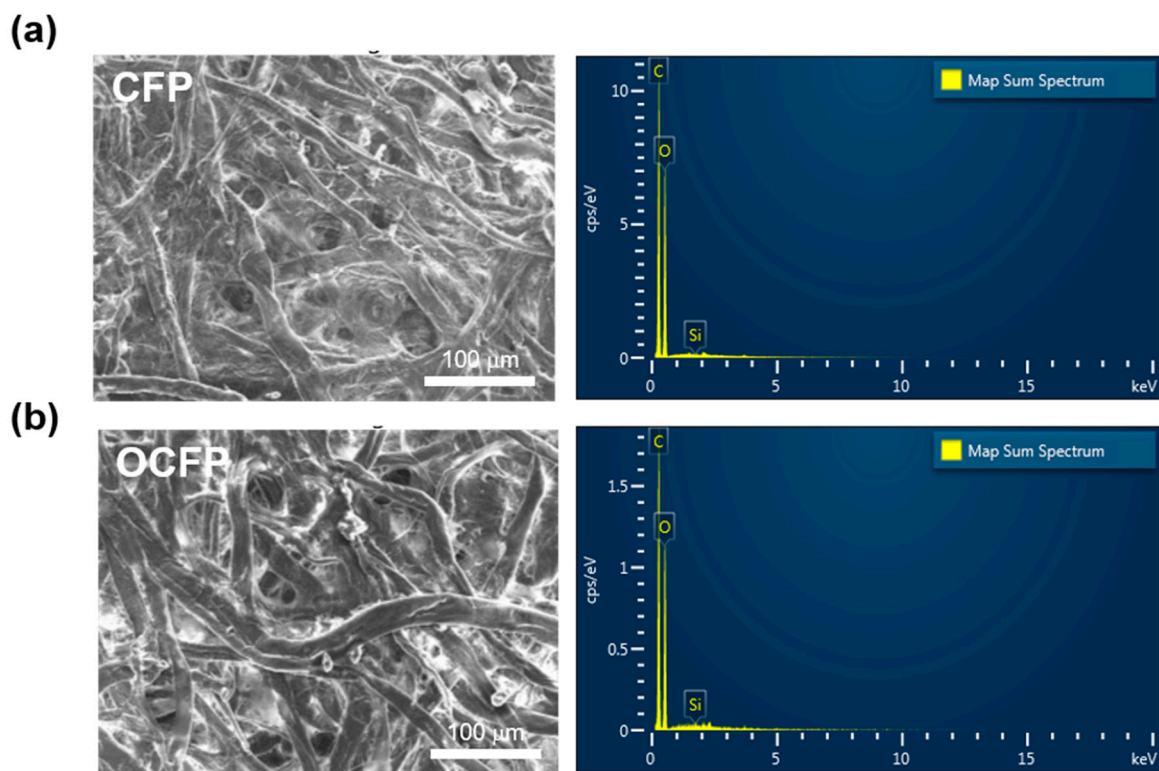

**Figure S4.** Scanning electron microscope (SEM) images and elemental (EDX) data of (a) CFP and (b) OCFP. The scale bar is 100  $\mu\text{m}$ .

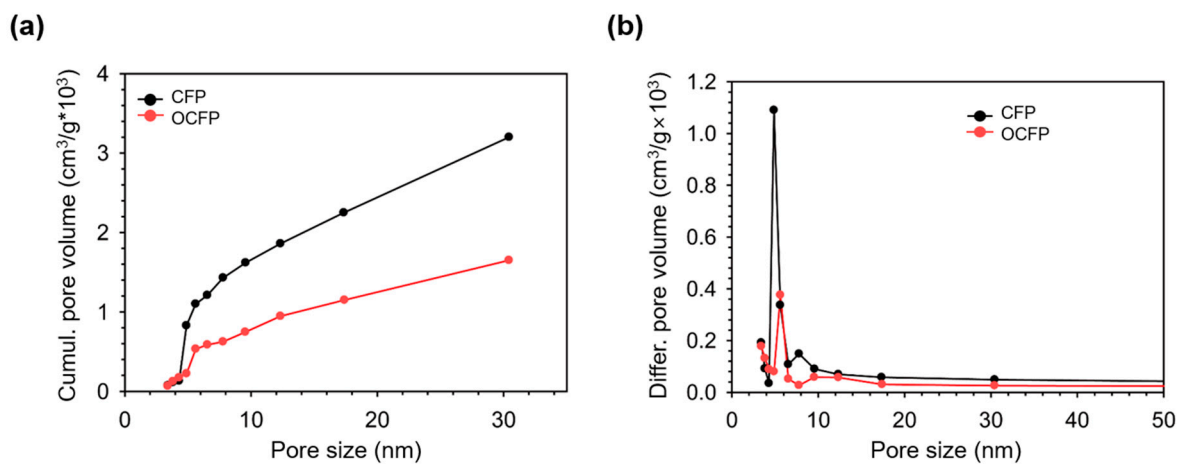

**Figure S5.** Porous properties of CFP and OCFP. (a) Cumulative pore volume and (b) Pore size distribution N<sub>2</sub> adsorption rate.

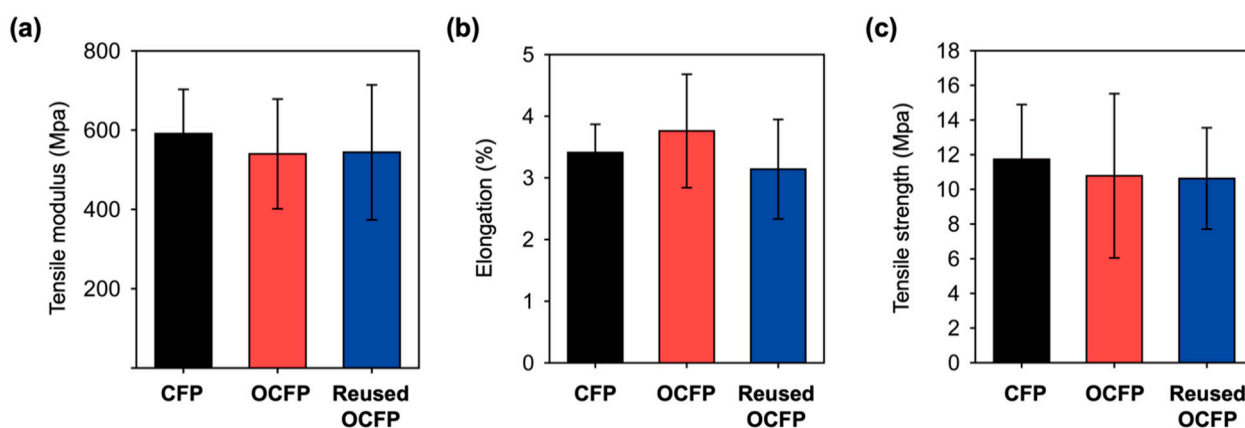

**Figure S6.** Universal Testing Machine (UTM) results of CFP, OCFP, and reused OCFP. (a) Tensile modulus, (b) Elongation at compliance, (c) Tensile strength.

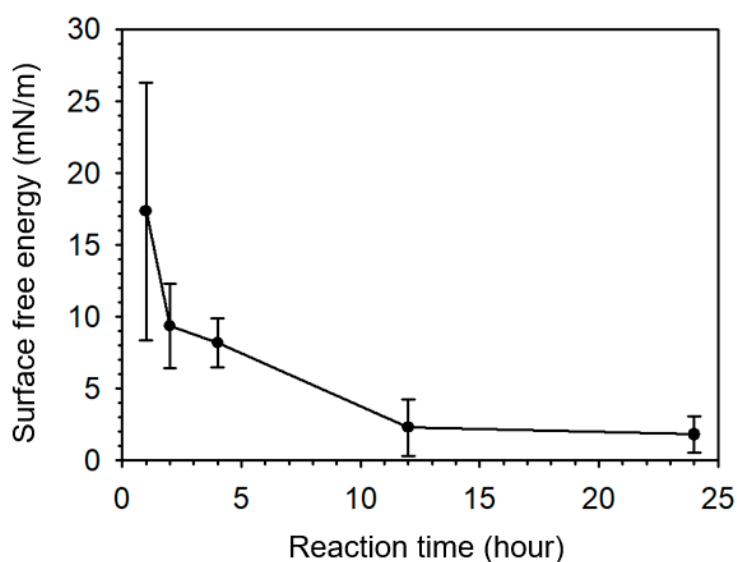

**Figure S7.** Variation of surface free energy of OCFP as reaction time.

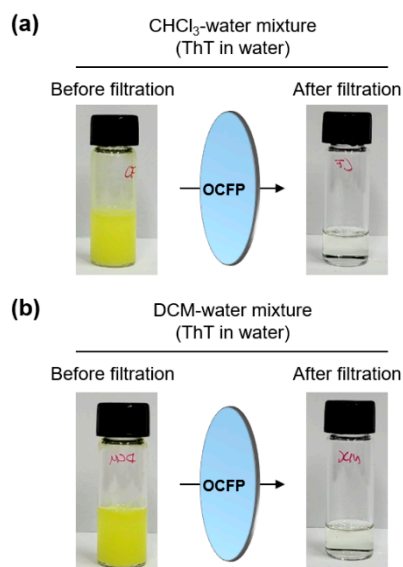

**Figure 8.** Separation of the oil-water mixture using OCFP. The CHCl<sub>3</sub> and DCM mixed with D.W. (with 0.01% ThT).

## 2. Supporting Tables

**Table S1.** The atomic ratio of C, O, and Si in CFP and OCFP obtained from EDX.

| Sample | C (%) | O (%) | Si (%) | Total (%) |
|--------|-------|-------|--------|-----------|
| CFP    | 55.27 | 44.73 | 0      | 100       |
| OCFP   | 56.10 | 43.80 | 0.1    | 100       |

**Table S2.** Mechanical properties of CFP, OCFP, and reused OCFP. All tests were conducted with the specimen size of 30 mm × 0.16 cm (area: 4.80 mm<sup>2</sup>).

| Sample      | Tensile Modulus (MPa) | Elongation at Compliance (%) | Tensile Strength (MPa) |
|-------------|-----------------------|------------------------------|------------------------|
| CFP         | 591                   | 3.41                         | 11.73                  |
| OCFP        | 540                   | 3.76                         | 10.78                  |
| Reused OCFP | 544                   | 3.14                         | 10.63                  |
